# Supplementary material
Source: publisher figshare collection journal article supplement (https://acs.figshare.com/ndownloader/files/4254952)

# One-Pot Synthesis of Novel Photochromic Oxazine Compounds

Weili Zhao<sup>\*,†,‡</sup> and Erick M. Carreira<sup>\*,§</sup>

*Key Laboratory for Special Functional Materials of the Ministry of Education, Henan University, Kaifeng, 475004, P. R. China, School of Pharmacy, Fudan University, Shanghai, 201203, P. R. China, and Lab. Für Organische Chemie, ETH-Zürich, CH-8093, Zürich, Switzerland*

## Supplementary Material

|                                                  |     |
|--------------------------------------------------|-----|
| General information.....                         | S-2 |
| General procedure.....                           | S-2 |
| Characterization data for oxazine compounds..... | S-2 |
| Reaction spectra: .....                          | S-4 |
| Copies of NMR spectra.....                       | S-7 |

## General information:

All reactions were performed using oven dried glassware. All chemicals were purchased from Aldrich and Fluka, and used as received. For flash chromatography technical grade solvents were used, which were distilled prior to use. Chromatographic purification was performed as flash chromatography using Brunschwig silica 32-63, 60 Å, with 0.3-0.5 bar pressure.

<sup>1</sup>H NMR spectra were recorded on a VARIAN Mercury 300 MHz spectrometer in chloroform-d, all signals are reported in ppm with the internal chloroform signal at 7.26 ppm. The data are reported as (s = singlet, d = doublet, t = triplet, q = quartet, m = multiplet, coupling constant(s), integration). <sup>13</sup>C NMR spectra were recorded with <sup>1</sup>H decoupling on a VARIAN Mercury 75 MHz spectrometer in chloroform-d, all signals are reported in ppm with the internal chloroform signal at 77.0 ppm as standard.

Infrared spectra were recorded on a Perkin Elmer Spectrum RX-I FT-IR spectrophotometer as thin films or as solution in chloroform and are reported as cm<sup>-1</sup>.

Mass spectrometric measurements were performed by the mass spectrometry service of the LOC at the ETHZ.

UV-Vis spectra were recorded in Varian Cary 50 UV-Vis spectrometer.

ReactIR spectra were recorded in ReactIR™ 4000 (Mettler Toledo).

**General procedure:** A mixture of disubstituted acrylic acid (1.0 mmol), DPPA (95%, 348 mg, 1.2 mmol), Et<sub>3</sub>N (506 mg, 5.0 mmol), 9,10-phenanthrenequinone (146 mg, 0.7 mmol) and Ph<sub>3</sub>AsO (16 mg, 0.05 mmol) in toluene (12 mL) was maintained at 60 °C over 3 h. Solvent was removed *in vacuo*. The photochromic oxazine compound was purified by chromatography (silica gel, dichloromethane-hexane as eluent) and recrystallization (from dichloromethane-hexane).

## Characterization data for oxazine compounds:

**2a:** 2,2-diphenyl-phenanthro (9,10)-[2H]-[1,4]-oxazine

M.p. 185.7-186.5 °C. <sup>1</sup>H NMR (300 MHz, CDCl<sub>3</sub>): δ 8.66-8.53 (m, 3H), 8.52-8.43 (m, 1H), 8.12 (s, 1H), 7.70-7.46 (m, 8H), 7.29-7.24 ppm (m, 6H). <sup>13</sup>C NMR (75MHz, CDCl<sub>3</sub>): δ 155.7, 141.4, 138.0, 131.3, 129.8, 128.6, 128.4, 127.6, 127.3, 127.1, 126.9, 126.9, 125.2, 125.1, 123.0, 122.8, 122.7, 122.5, 79.5 ppm. IR (KBr): ν = 3056 (w), 3028 (w), 1609 (w), 1577 (m), 1488 (m), 1448 (m), 1320 (m), 1230 (m), 1111 (m), 1018 (m), 753 (s), 723 (m), 697 (s) cm<sup>-1</sup>. HRMS (MALDI) Calcd for C<sub>28</sub>H<sub>19</sub>NO: m/z (%): 386.1539 (MH<sup>+</sup>). Found: 386.1535 (100%).

**2b:** 2-(*p*-methoxyphenyl)-2-phenyl-phenanthro (9,10)-[2H]-[1,4]-oxazine

M.p. 167.2-167.9 °C. <sup>1</sup>H NMR (300 MHz, CDCl<sub>3</sub>): δ 8.62-8.53 (m, 3H), 8.52-8.44 (m, 1H), 8.07 (s, 1H), 7.66-7.61 (m, 3H), 7.60-7.50 (m, 3H), 7.42-7.29 (m, 5H), 6.80-6.60 (m, 2H), 3.74 ppm (s, 3H). <sup>13</sup>C NMR (75MHz, CDCl<sub>3</sub>): δ 159.7, 155.9, 141.6, 138.0, 133.3, 131.2, 129.8, 128.6, 128.3, 127.5, 127.3, 127.0, 126.9, 126.8, 125.2, 125.1, 122.9, 122.8, 122.8, 122.7, 122.5, 114.0, 79.4, 55.2 ppm. IR (KBr): ν = 3061 (w), 3031 (w), 2954 (w), 1608 (m), 1581 (m), 1511 (m), 1448 (m), 1254 (m), 1237 (m), 1016 (s), 830 (m), 752 (m), 701 (m) cm<sup>-1</sup>. HRMS (MALDI) Calcd for C<sub>29</sub>H<sub>20</sub>NO<sub>2</sub>: m/z (%): 416.1645 (MH<sup>+</sup>). Found: 416.1642 (100%).

**2c:** 2-(*p*-fluorophenyl)-2-phenyl-phenanthro (9,10)-[2*H*]-[1,4]-oxazine

M.p. 140.8-141.8 °C. <sup>1</sup>H NMR (300 MHz, CDCl<sub>3</sub>): δ 8.64-8.55 (m, 3H), 8.46-8.44 (m, 1H), 8.01 (s, 1H), 7.71-7.60 (m, 3H), 7.60-7.52 (m, 1H), 7.52-7.44 (m, 2H), 7.42-7.37 (m, 2H), 7.08-6.98 (m, 2H), 6.88-6.82 (m, 2H), 3.76 ppm (s, 3H). <sup>13</sup>C NMR (75 MHz, CDCl<sub>3</sub>): δ 162.3 (<sup>1</sup>J = 247.2 Hz), 160.7, 159.5, 155.2, 137.6, 137.1, 132.7, 131.0, 129.4, 128.8 (<sup>3</sup>J = 7.9 Hz), 128.3, 127.5, 127.2, 126.7, 125.0, 124.9, 122.8, 122.6, 122.5 (<sup>2</sup>J = 24.8 Hz), 122.5, 115.5, 115.2, 113.9, 79.0, 55.3 ppm. IR (KBr): ν = 3065 (w), 2933 (w), 2841 (w), 1608 (m), 1581 (m), 1510 (s), 1258 (m), 1240 (s), 1160 (m), 1016 (m), 830 (m), 751 (m), 721 (m) cm<sup>-1</sup>. HRMS (MALDI) Calcd for C<sub>29</sub>H<sub>20</sub>FNO<sub>2</sub>: m/z (%): 434.1551 (MH<sup>+</sup>). Found: 434.1548 (100%).

**2d:** 2,2-di-(*p*-methoxyphenyl)-phenanthro (9,10)-[2*H*]-[1,4]-oxazine

M.p. 152.4-153.4 °C. <sup>1</sup>H NMR (300 MHz, CDCl<sub>3</sub>): δ 8.63-8.54 (m, 3H), 8.47-8.43 (m, 1H), 8.03 (s, 1H), 7.68 -7.62 (m, 3H), 7.60-7.52 (m, 1H), 7.45-7.35 (m, 4H), 6.90-6.80 (m, 4H), 3.80-3.70 (m, 4H), 3.07-2.98 (m, 4H), 3.75 ppm (s, 6H). <sup>13</sup>C NMR (75 MHz, CDCl<sub>3</sub>): δ 159.7, 156.1, 133.5, 131.2, 129.8, 128.5, 127.5, 127.3, 126.8, 125.1, 122.9, 122.8, 122.7, 122.5, 114.0, 79.3, 55.2 ppm; IR (KBr): ν = 3073 (w), 3002 (w), 2983 (w), 2831 (w), 1608 (m), 1586 (m), 1509 (s), 1450 (m), 1300 (m), 1252 (s), 1172 (m), 1116 (m), 1023 (m), 831 (m), 757 (m), 725 (m) cm<sup>-1</sup>. HRMS (MALDI) Calcd for C<sub>30</sub>H<sub>23</sub>NO<sub>3</sub>: m/z (%): 446.1751 (MH<sup>+</sup>). Found: 446.1747 (100%).

**2e:** 2-(*p*-methoxyphenyl)-2-(*p*-morpholinophenyl)-phenanthro (9,10)-[2*H*]-[1,4]-oxazine

M.p. 135.0-136.0 °C. <sup>1</sup>H NMR (300 MHz, CDCl<sub>3</sub>): δ 8.69-8.52 (m, 3H), 8.53-8.43 (m, 1H), 8.04 (s, 1H), 7.71 -7.60 (m, 3H), 7.60-7.50 (m, 1H), 7.46-7.38 (m, 2H), 7.38-7.30 (m, 2H), 6.89-6.80 (m, 2H), 6.77-6.68 (m, 2H), 3.75 ppm (s, 3H). <sup>13</sup>C NMR (75 MHz, CDCl<sub>3</sub>): δ 159.5, 156.2, 150.9, 138.1, 133.5, 132.0, 129.8, 128.5, 128.1, 127.4, 127.3, 126.8, 125.3, 125.0, 122.8, 122.7, 122.6, 122.5, 114.9, 113.8, 79.2, 66.6, 55.1, 48.4, 29.6 ppm. IR (KBr): ν = 3069 (w), 2956 (w), 2823 (w), 1608 (m), 1512 (s), 1450 (m), 1253 (m), 1228 (m), 1120 (m), 927 (m), 821 (m), 756 (m) cm<sup>-1</sup>. HRMS (MALDI) Calcd for C<sub>33</sub>H<sub>28</sub>N<sub>2</sub>O<sub>3</sub>: m/z (%): 499.2016 (M-H<sub>2</sub><sup>+</sup>). Found: 499.2013 (100%).

**2f:** 2-(*p*-methoxyphenyl)-2-(*p*-piperidinophenyl)-phenanthro (9,10)-[2*H*]-[1,4]-oxazine

M.p. 134.5-136.0 °C. <sup>1</sup>H NMR (300 MHz, CDCl<sub>3</sub>): δ 8.63-8.54 (m, 3H), 8.50-8.40 (m, 1H), 8.02 (s, 1H), 7.70 -7.50 (m, 4H), 7.45-7.38 (m, 2H), 7.36-7.29 (m, 2H), 6.89-6.80 (m, 4H), 3.76 (s, 3H), 3.18-3.08 (m, 4H), 1.72-1.60 (m, 4H), 1.60-1.48 ppm (m, 2H). <sup>13</sup>C NMR (75 MHz, CDCl<sub>3</sub>): δ 159.4, 156.2, 151.7, 138.1, 133.6, 131.0, 128.5, 128.0, 127.3, 127.1, 126.7, 126.6, 125.3, 124.8, 122.8, 122.6, 122.5, 122.4, 115.5, 113.7, 79.4, 55.2, 49.8, 25.7, 24.2 ppm. IR (KBr): ν = 2929 (m), 2889 (w), 2838 (w), 1605 (m), 1510 (s), 1379 (m), 1255 (m), 1174 (m), 1114 (m), 1020 (m), 836 (m), 816 (m), 759 (m), 726 (m) cm<sup>-1</sup>. HRMS (MALDI) Calcd for C<sub>34</sub>H<sub>30</sub>N<sub>2</sub>O<sub>2</sub>: m/z (%): 497.2224 (M-H<sup>+</sup>). Found: 497.2216 (100%).

**2g:** 2-cyclopropyl-2-phenyl-phenanthro (9,10)-[2*H*]-[1,4]-oxazine

M.p. 108.0-109.0 °C. <sup>1</sup>H NMR (300 MHz, CDCl<sub>3</sub>): δ 8.70-8.47 (m, 3H), 8.47-8.36 (m, 1H), 8.00 (s, 1H), 7.78 -7.45 (m, 6H), 7.38-7.19 (m, 3H), 1.66-1.54 (m, 1H), 0.94-0.60

ppm (m, 4H).  $^{13}\text{C}$  NMR (75 MHz,  $\text{CDCl}_3$ ):  $\delta$  156.0, 141.0, 138.7, 131.1, 129.9, 128.4, 128.3, 127.5, 127.3, 126.8, 126.7, 125.8, 125.0, 122.9, 122.6, 122.6, 122.5, 76.6, 19.5, 1.4, 0.8 ppm. IR (KBr): 3074 (m), 3009(m), 1611 (w), 1578 (m), 1496 (m), 1447 (m), 1319 (m), 1242 (m), 1166 (m), 1111 (m), 1047 (m), 754 (m), 722 (m), 705(m)  $\text{cm}^{-1}$ . HRMS (MALDI) Calcd for  $\text{C}_{25}\text{H}_{19}\text{NO}$ :  $m/z$  (%): 350.1539 ( $\text{MH}^+$ ). Found: 350.1540 (100%).

**2h:** 2-methyl-2-phenyl-phenanthro (9,10)-[2H]-[1,4]-oxazine

M.p. 119.0-120.0  $^{\circ}\text{C}$ .  $^1\text{H}$  NMR (300 MHz,  $\text{CDCl}_3$ ):  $\delta$  8.70-8.54 (m, 3H), 8.54-8.45 (m, 1H), 7.94 (s, 1H), 7.74 -7.60 (m, 4H), 7.60-7.46 (m, 4H), 7.38-7.20 (m, 4H), 1.96 ppm (s, 3H).  $^{13}\text{C}$  NMR (75 MHz,  $\text{CDCl}_3$ ):  $\delta$  156.6, 142.0, 138.5, 131.0, 129.7, 128.6, 128.0, 127.4, 127.2, 126.7, 126.7, 125.1, 124.9, 124.9, 122.7, 122.6, 122.5, 122.5, 122.4, 75.5, 26.0 ppm. IR (KBr):  $\nu$  = 3074 (w), 3025 (w), 3001 (w), 2940 (w), 1608 (w), 1580 (m), 1494 (m), 1443 (m), 1322 (m), 1167 (m), 1140 (m), 1015 (m), 764 (m), 726 (m), 708 (m)  $\text{cm}^{-1}$ . HRMS (MALDI) Calcd for  $\text{C}_{23}\text{H}_{17}\text{NO}$ :  $m/z$  (%): 324.1383 ( $\text{MH}^+$ ). Found: 324.1384 (100%).

**Reaction spectra:**

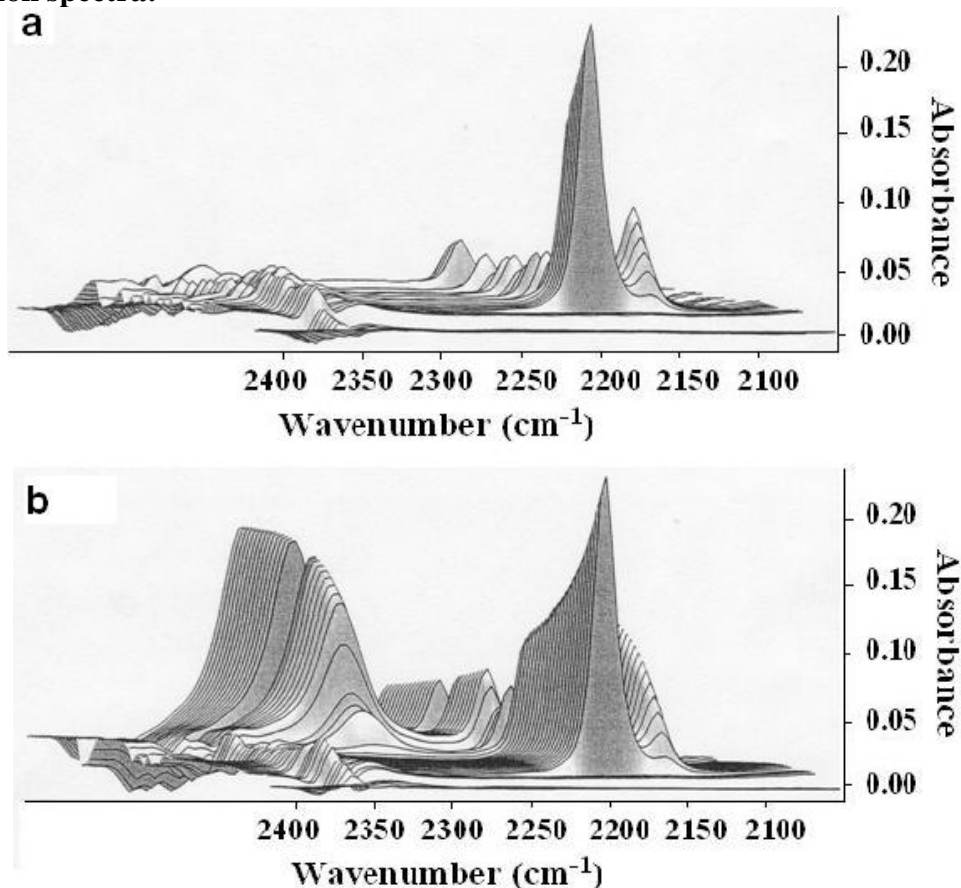

**Figure 1.** ReactIR spectra of one-pot reaction of 3,3-diphenyl acrylic acid (0.2 mmol scale), DPPA,  $\text{Et}_3\text{N}$ ,  $\text{Ph}_3\text{AsO}$ , and 9,10-phenanthrenequinone in argon in degassed toluene (2 mL) from ambient temperature to 70  $^{\circ}\text{C}$  over 1 h (a), and the control

experiment without  $\text{Ph}_3\text{AsO}$  and 9,10-phenanthrenequinone (b). The spectra were taken in 1 min interval.

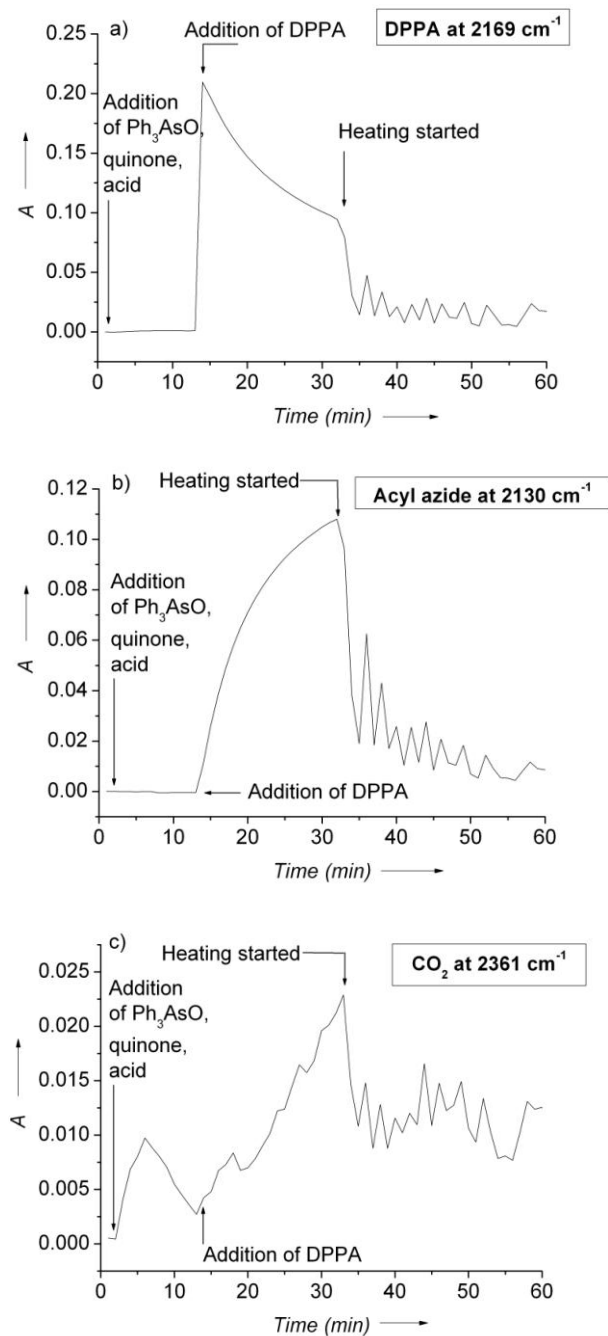

**Figure 2.** ReactIR profiles of Figure 1 (a). The ReactIR spectra of the one-pot formation of 2,2-diphenyl- phenanthro (9,10)-[2*H*]-[1,4]-oxazine compound (**1a**) in Figure 1 (a) and the profiles in Figure 2 (b) clearly indicated the fast formation of acyl azide at 2130  $\text{cm}^{-1}$  and concomitantly consumption of DPPA at 2169  $\text{cm}^{-1}$ . The isocyanate intermediate observed in the control experiment Figure 1 (b) at 2264  $\text{cm}^{-1}$  could not be seen in Figure 1 (a), which indicates such an intermediate to be captured immediately once it was formed. The profile 2 (c) indicated the generation of  $\text{CO}_2$  at 2361  $\text{cm}^{-1}$ .

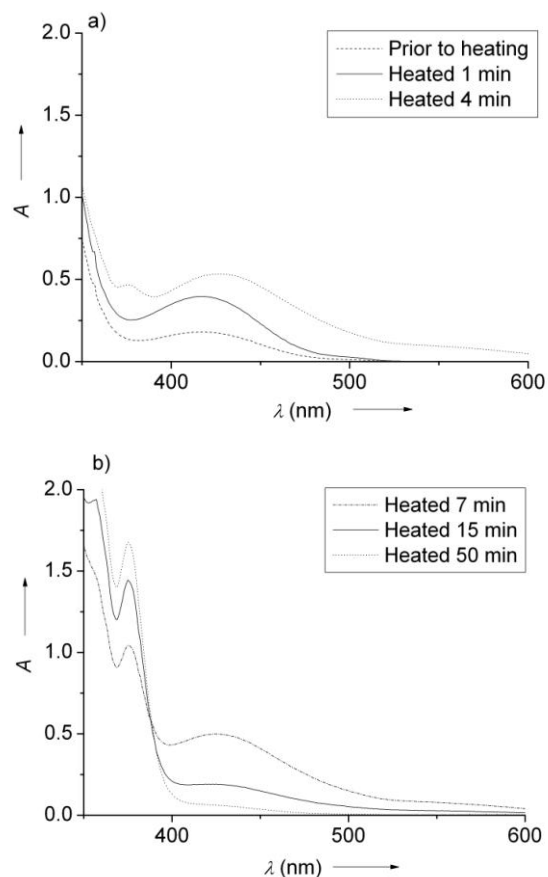

**Figure 3.** UV-Vis spectra of one-pot reaction of 3,3-diphenyl acrylic acid (0.2 mmol scale), DPPA,  $\text{Et}_3\text{N}$ ,  $\text{Ph}_3\text{AsO}$ , and 9,10-phenanthrenequinone in toluene (2 mL) from ambient temperature to 70 °C over 1 h. Each spectrum was obtained by taken 40  $\mu\text{L}$  of the reaction mixture and diluted in 2.5 mL toluene.

The formation of quinone-imine intermediate and final product could be easily captured by UV-Vis spectrometer (Figure 3). The starting 9,10-phenanthrenequinone absorbs at 415 nm. New colored species absorb at longer wavelength was generated upon heating, which was transformed to the oxazine (absorbs at much shorter wavelength) with extended time of heating indicated by the increased absorption at 360 nm.

## Copies of NMR spectra:

LOC ETHZ NMR USER:asha GROUP:camel SAMPLE:WZ-BisPhoxazine Acq on GEM 300 Nr.1 Printed from surfWS 07/05/00 11:23:04

### STANDARD 1H OBSERVE

Pulse Sequence: zgpg30  
Solvent: CDCl3  
Ambient temperature  
User: asha  
File: WZ-BisPhoxazine  
Memory: 300 "normal"  
PULSE SEQUENCE  
Pulse 30.3 degrees  
Acq. time 3.118 sec  
Width 5099.4 Hz  
32 repetitions  
OBSERVE H1: 300.0641250 MHz  
DATA PROCESSING  
F1 size 32768  
Total time 56 min, 20 sec

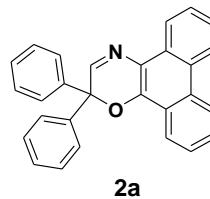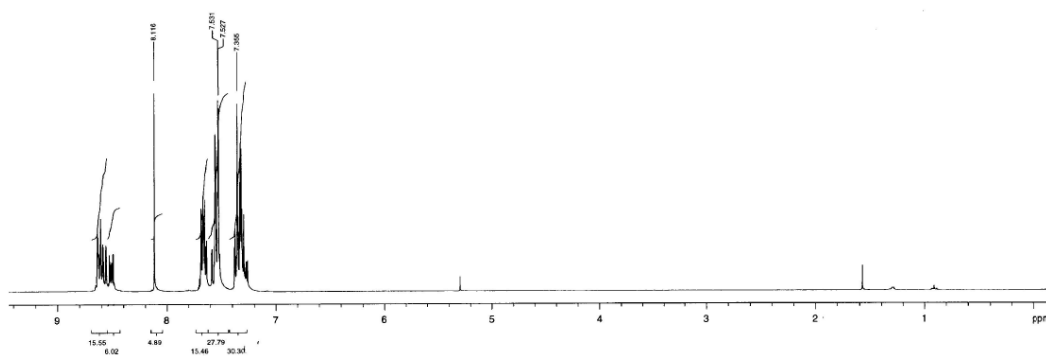

LOC ETHZ NMR USER:asha GROUP:camel SAMPLE:WZ-BisPhoxazine Acq on GEM 300 Nr.1 Printed from surfWS 07/05/00 11:26:45

### 13C OBSERVE

Pulse Sequence: zgpg30  
Solvent: CDCl3  
Ambient temperature  
User: asha  
File: WZ-BisPhoxazine  
Memory: 300 "normal"  
PULSE SEQUENCE  
Relax. delay 1.200 sec  
Pulse 45.5 degrees  
Acq. time 0.800 sec  
Width 20000.0 Hz  
784 repetitions  
OBSERVE C13: 75.4511657 MHz  
DECOUPLE H1: 300.0653181 MHz  
Power 45 dB  
continuously on  
WALTZ-16 modulated  
DATA PROCESSING  
Line broadening 1.0 Hz  
F1 size 32768  
Total time 33 min, 31 sec

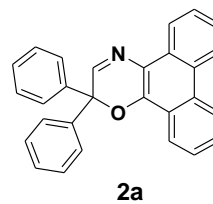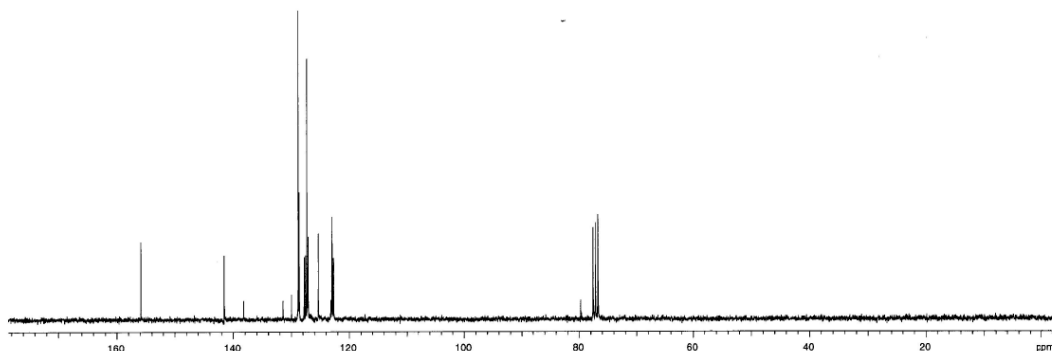

LOC ETHZ NMR USER:zhaog GROUP:carne SAMPLE:wz-MeOPhProxazine Acq on DEM 300 N:1 Printed from satWS 07/04/05 17:32:32

# STANDARD 1H OBSERVE

Pulse Sequence: zgpg30  
 Solvent: CDCl3  
 Ambient temperature  
 User: zhaog  
 File: WZ-MeOPhProxazine  
 Macro: zgpg30 "nmr"  
 PULSE SEQUENCE  
 Pulse: 30.3 degrees  
 Acq. time: 3.138 sec  
 Width: 5099.4 Hz  
 32 repetitions  
 OBSERVE: H1, 300.0641260 MHz  
 DATA PROCESSING  
 FT size 32768  
 Total time 56 min, 20 sec

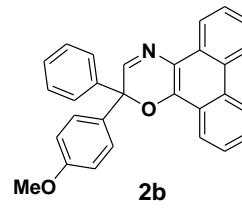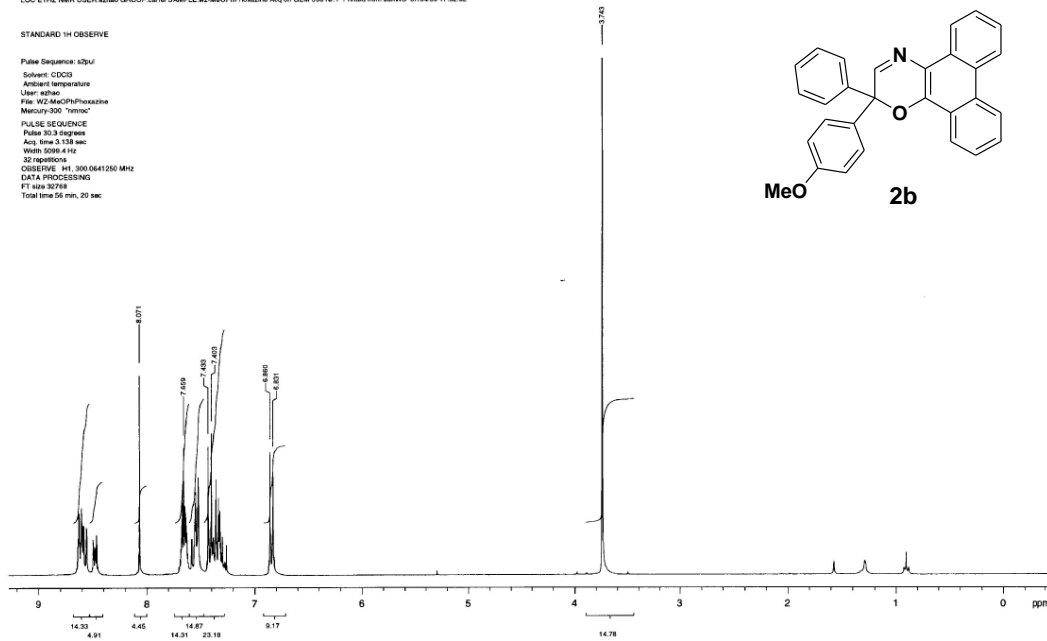

LOC ETHZ NMR GEMIN 300 MHz N:1 07/04/05 17:21:54 USER:zhaog GROUP:carne SAMPLE:wz-MeOPhProxazine

# 13C OBSERVE

Solvent: CDCl3  
 Ambient temperature  
 User: zhaog  
 GEMIN: zgpg30 "gem30c"  
 PULSE SEQUENCE  
 Pulse: 45.5 degrees  
 Acq. time: 0.860 sec  
 Width: 30000.0 Hz  
 328 repetitions  
 OBSERVE: C13, 75.4511657 MHz  
 DECOUPLE: H1, 300.0653181 MHz  
 Power: 45.48  
 continuously on  
 WALTZ-16 modulated  
 DATA PROCESSING  
 FT size 32768  
 Total time 27 minutes

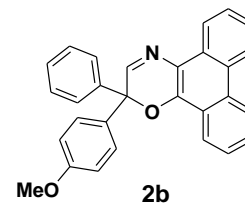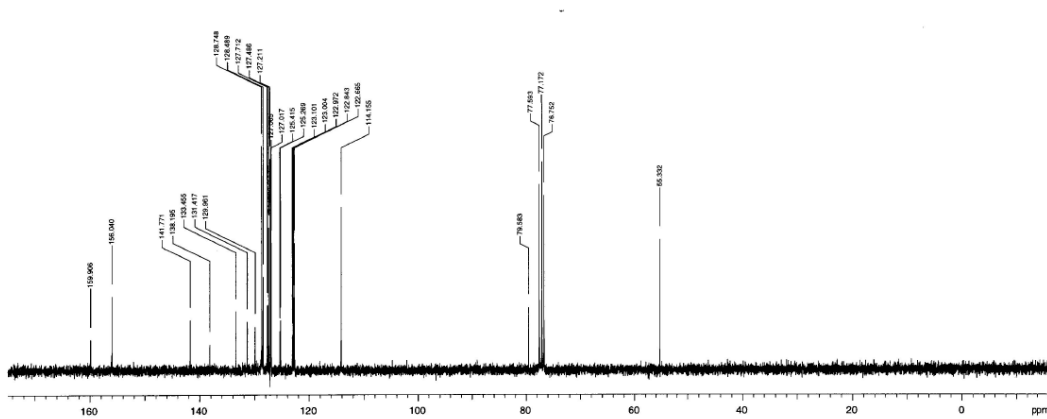



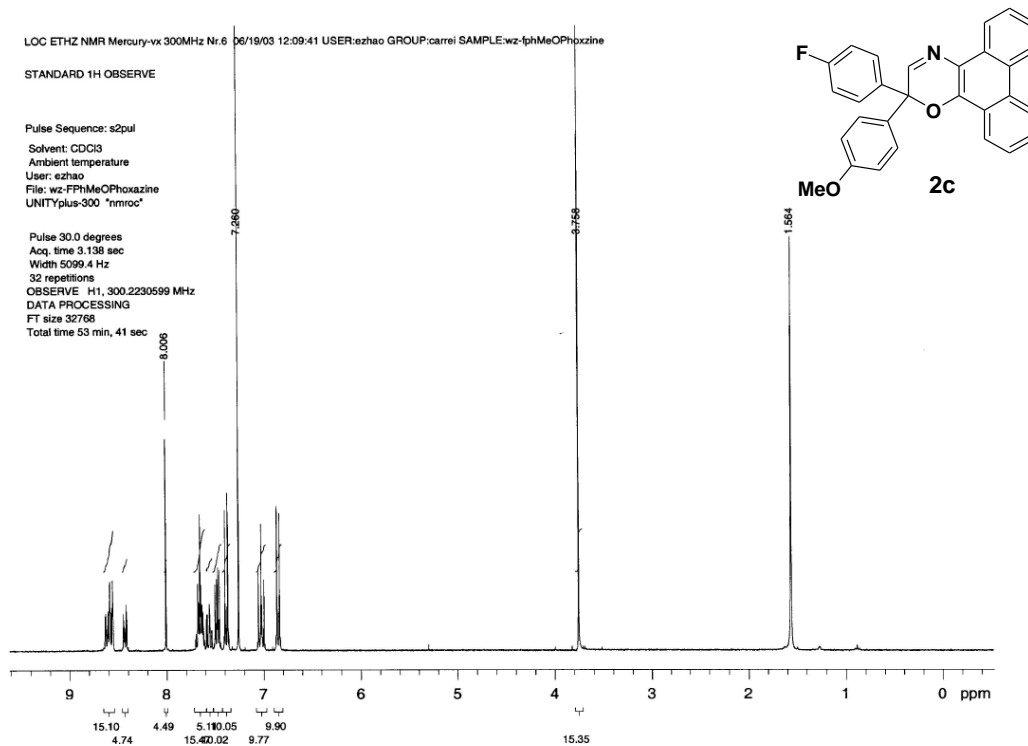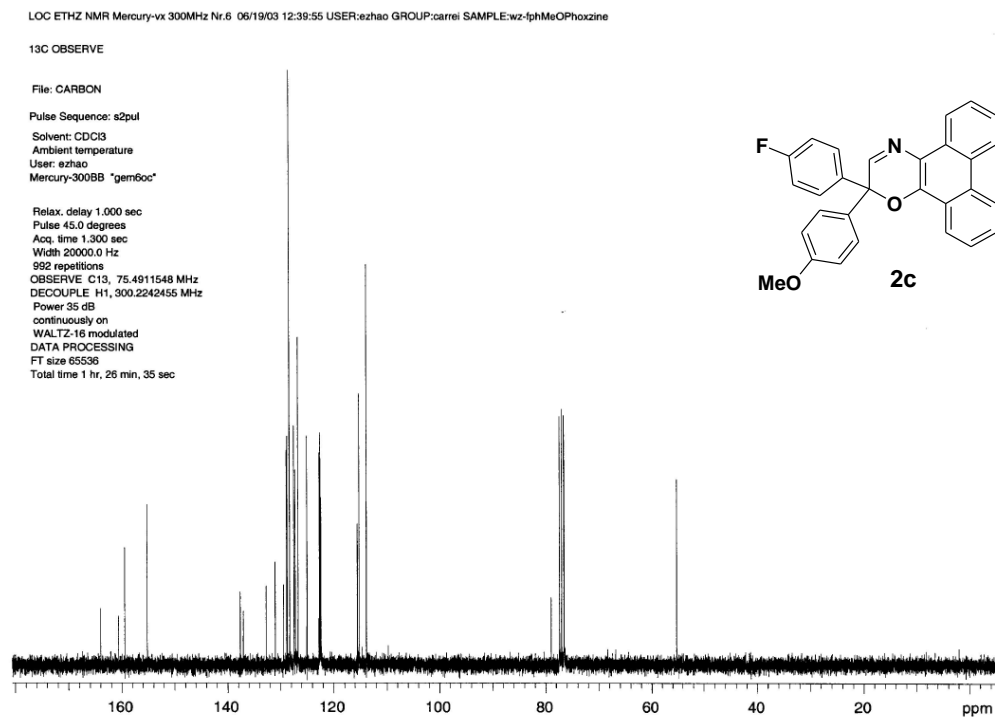

LOC ETHZ NMR GEMINI 300 MHz N: 1 0704100 15:50:03 USER:ethan GROUP:ame SAMPLE: BzMeOPhtsazine

# STANDARD 1H OBSERVE

Solvent: CDCl3  
Ambient temperature  
User: ethan  
GEMINI-300B5 "gem3oc"  
PULSE SEQUENCE  
Pulse 30.3 degrees  
Acq. time 3.136 sec  
Width: 3000.0 Hz  
16 repetitions  
OBSERVE: H1, 300.0641250 MHz  
DATA PROCESSING  
FT size 32768  
Total time 5 minutes

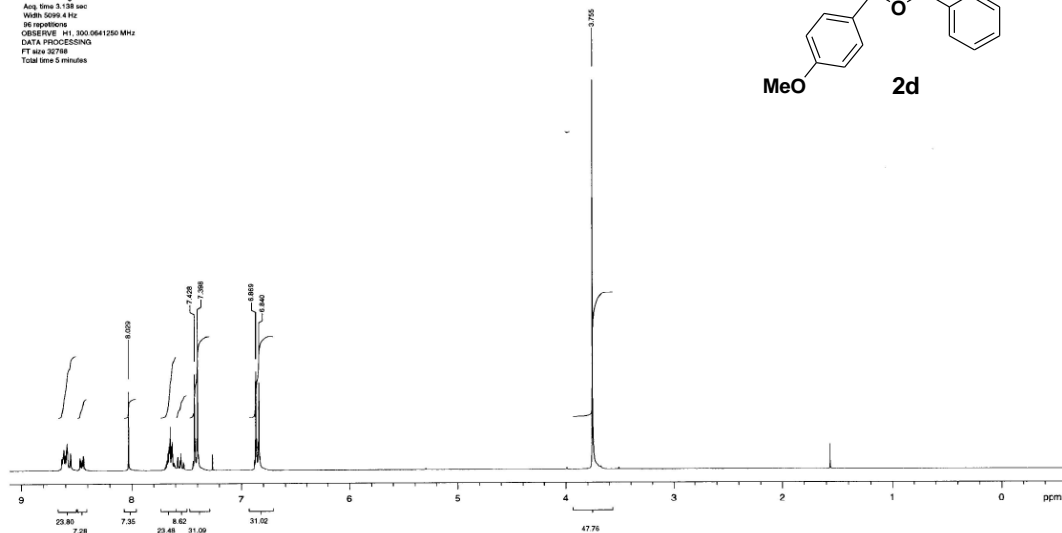

LOC ETHZ NMR GEMINI 300 MHz N: 1 0704100 16:24:27 USER:ethan GROUP:ame SAMPLE: BzMeOPhtsazine

# 13C OBSERVE

Solvent: CDCl3  
Ambient temperature  
User: ethan  
GEMINI-300B5 "gem3oc"  
PULSE SEQUENCE  
Pulse 45.5 degrees  
Acq. time 0.800 sec  
Width: 20000.0 Hz  
1024 repetitions  
OBSERVE: C13, 75.4511687 MHz  
DECOUPLE: H1, 300.0651011 MHz  
Power: 45.0 dB  
continuously on  
WALTZ-16 modulated  
DATA PROCESSING  
FT size 32768  
Total time 30 minutes

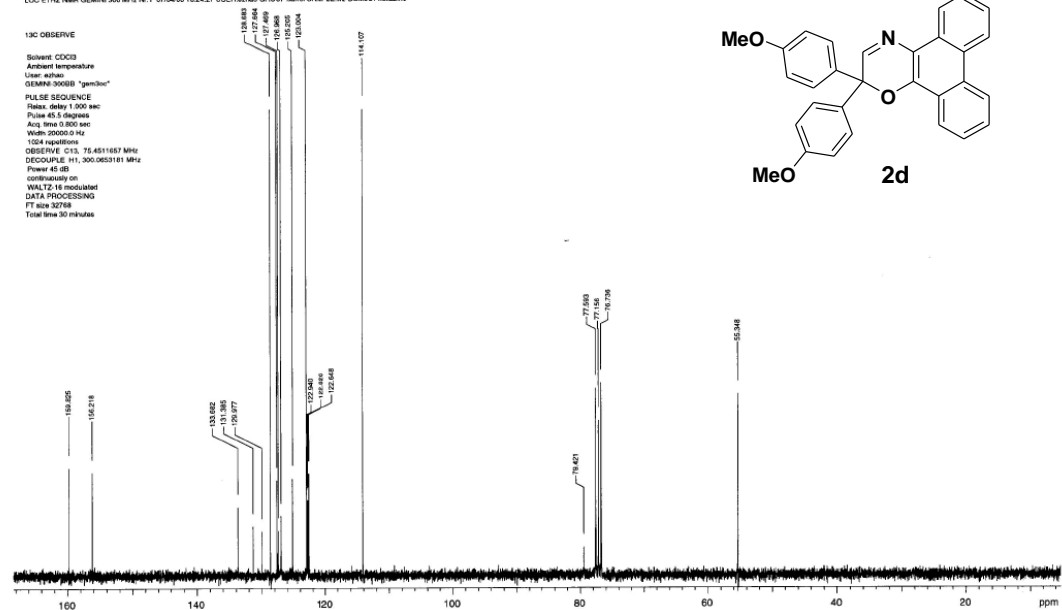

LOC ETHZ NMR MERCURY 300 MHz N-1 04/10/11 18:43:58 USER:arhaoo GROUP:camet SAMPLE:wz-MorphMeOphosazine

# STANDARD 1H OBSERVE

Pulse Sequence: zgpg30  
Solvent: CDCl3  
Ambient temperature  
User: arhaoo  
Mercury-300BB 'gmskdc'  
PULSE SEQUENCE  
Pulse 20.7 degrees  
Acq. time 3.138 sec  
Width 2000.0 Hz  
98 repetitions  
OBSERVE: 1H, 300.0803645 MHz  
DATA PROCESSING  
FT size 32768  
Total time 58 min, 20 sec

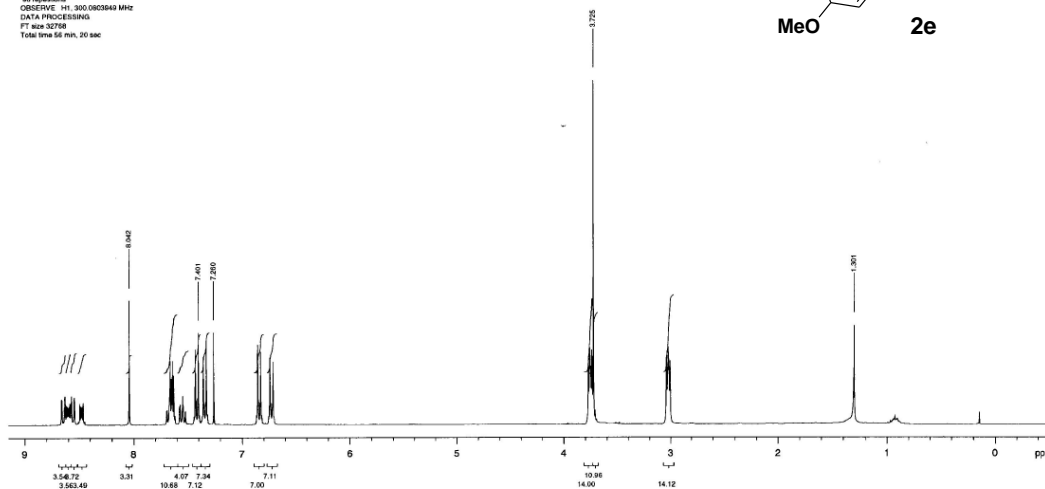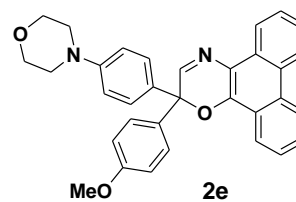

LOC ETHZ NMR GEMINI 300 MHz N-1 04/11/01 13:15:00 USER:arhaoo GROUP:camet SAMPLE:wz-C13MorphMeOphosazine

# 13C OBSERVE

Solvent: CDCl3  
Ambient temperature  
User: arhaoo  
GEMINI-300BB 'gmskdc'  
PULSE SEQUENCE  
Relax. delay 1.000 sec  
Pulse 45.5 degrees  
Acq. time 0.820 sec  
Width 20000.0 Hz  
256 repetitions  
OBSERVE: C13, 75.4511848 MHz  
DECUPLE: 1H, 300.0803181 MHz  
Power 45 dB  
continuously on  
WALTZ-16 modulated  
DATA PROCESSING  
Line broadening 1.0 Hz  
FT size 32768  
Total time 7 minutes

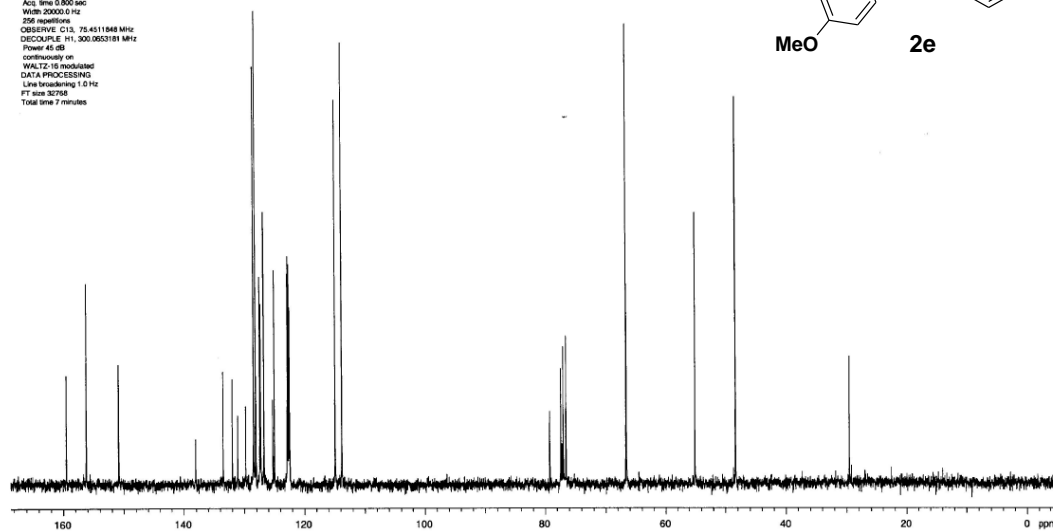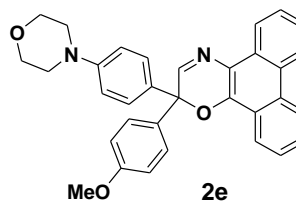

Pulse Sequence: s2pul  
Solvent: CDCl<sub>3</sub>  
Ambient temperature  
User: szhao  
Mercury-300B "gmvloc"  
PULSE SEQUENCE  
Pulse 29.7 degrees  
Acq. time 3.138 sec  
Width 5099.4 Hz  
64 repetitions  
OBSERVE H1, 300.0803949 MHz  
DATA PROCESSING  
FT size 32768  
Total time 56 min, 20 sec

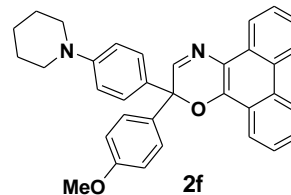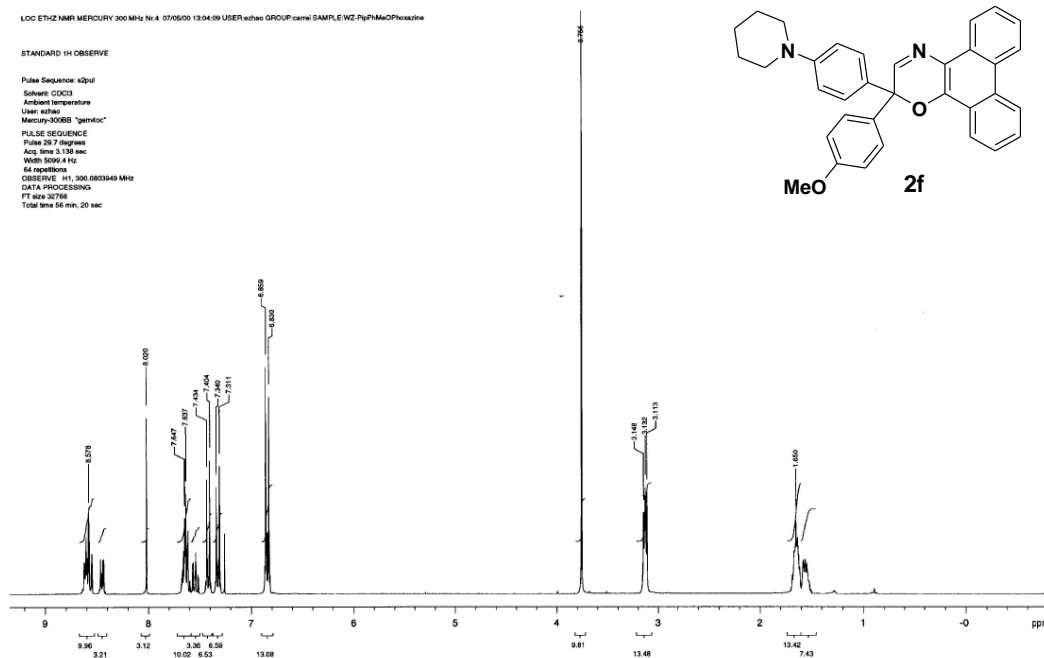

13C OBSERVE

Pulse Sequence: szpul  
Solvent: CDCl<sub>3</sub>  
Ambient temperature  
User: azhao  
File: WZ-C13PpHMeOPhosazine  
Mercury-300 "nmrco"  
  
PULSE SEQUENCE  
Relax, delay 1.000 sec  
Pulse 45.0 degrees  
Acq. time 0.800 sec  
Width 20000.0 Hz  
1502 repetitions  
OBSERVE C13, 75.4552728 MHz  
DECOUPLE H1, 300.8015951 MHz  
Power 35 dB  
continuously on  
WALTZ-16 modulated  
DATA PROCESSING  
FT aqza 32768  
Total time 1 hr, 7 min, 2 sec

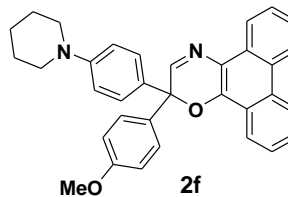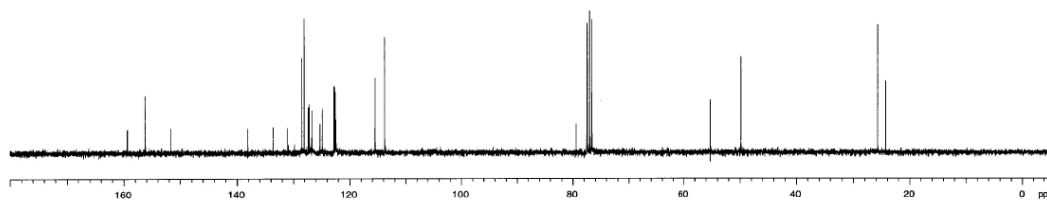

LOC ETHZ NMR USER: xzhao GROUP: canal SAMPLE: WZ-CyclopropylPhoxazine Acq on GEM 200 N:1 Printed from surWS 08/24/00 14:12:56

# STANDARD 1H OBSERVE

Pulse Sequence: zgpg30  
 Solvent: CDCl3  
 Ambient temperature  
 User: xzhao  
 File: WZ-CyclopropylPhoxazine  
 Mercury 200 1h1m1s  
 PULSE SEQUENCE  
 Pulse: zgpg30  
 Acq. time: 2:30.3 sec  
 Width: 3400.0 Hz  
 NS: 1024  
 OBSERVE: H1, 199.950072 MHz  
 DATA PROCESSING  
 FT size: 13344  
 Total time: 41 min, 57 sec

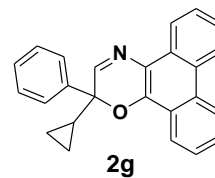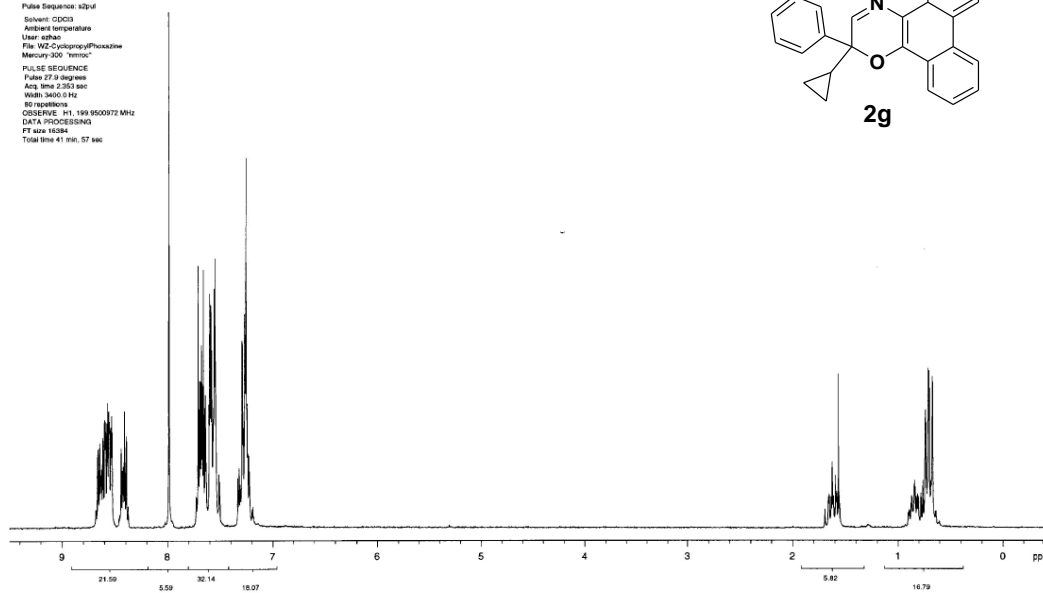

LOC ETHZ NMR GEMINI 300 MHz N:1 07/06/00 13:38:05 USER: xzhao GROUP: canal SAMPLE: WZ-C13CyclopropylPhoxazine

# 13C OBSERVE

Solvent: CDCl3  
 Ambient temperature  
 User: xzhao  
 GEMINI-300SB 1h1m1s  
 PULSE SEQUENCE  
 Relax: delay 1.000 sec  
 Pulse: zgpg30  
 Acq. time: 0:00.0 sec  
 Width: 20000.0 Hz  
 NS: 1024  
 OBSERVE: C13, 75.4511657 MHz  
 DECOUPLE: H1, 300.0653181 MHz  
 Power: 45 dB  
 continuously on  
 WALTZ-16 modulated  
 DATA PROCESSING  
 FT size: 32768  
 Total time: 56 minutes

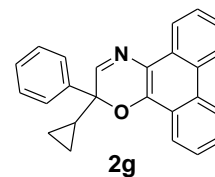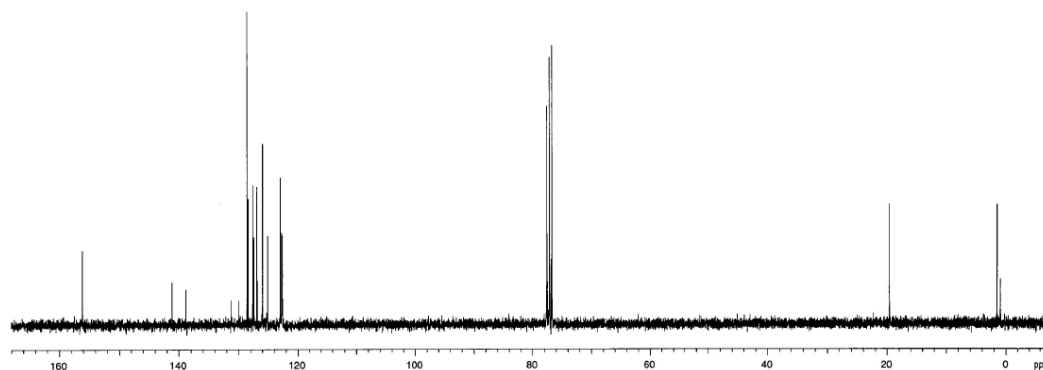

LOC ETHZ NMR GEMINI 300 MHz N-1 07/06/00 09:07:33 USER:achas GROUP:carri SAMPLE:WZ-MaPhosazine

# STANDARD 1H OBSERVE

Solvent: CDCl3  
 Ambient temperature  
 User: achas  
 GEMINI-3000B "gemdec"  
 PULSE SEQUENCE  
 Pulse 30.3 degrees  
 Acq. time 3.118 sec  
 Width 5000.4 Hz  
 60 repetitions  
 OBSERVE H1, 300.0641250 MHz  
 DATA PROCESSING  
 FT size 32768  
 Total time 5 minutes

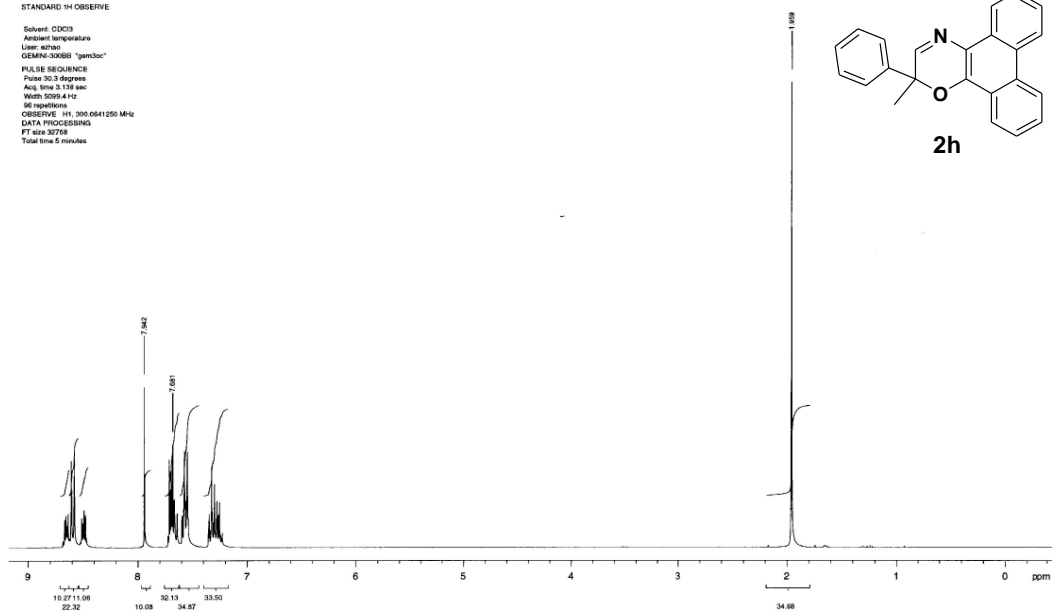

LOC ETHZ NMR MERCURY 300 MHz N-1 07/06/00 13:22:43 USER:achas GROUP:carri SAMPLE:WZ-C13MaPhosazine

# 13C OBSERVE

Pulse Sequence: zgpg30  
 Solvent: CDCl3  
 Ambient temperature  
 User: achas  
 Mercury-3000B "gemdec"  
 PULSE SEQUENCE  
 Relax delay 1.000 sec  
 Pulse 45.0 degrees  
 Acq. time 0.800 sec  
 Width 20000.0 Hz  
 628 repetitions  
 OBSERVE C13, 75.4550728 MHz  
 DECOUPLE H1, 300.0615951 MHz  
 Power 30 dB  
 continuously on  
 WALTZ-16 modulated  
 DATA PROCESSING  
 FT size 32768  
 Total time 1 hr, 7 min, 2 sec

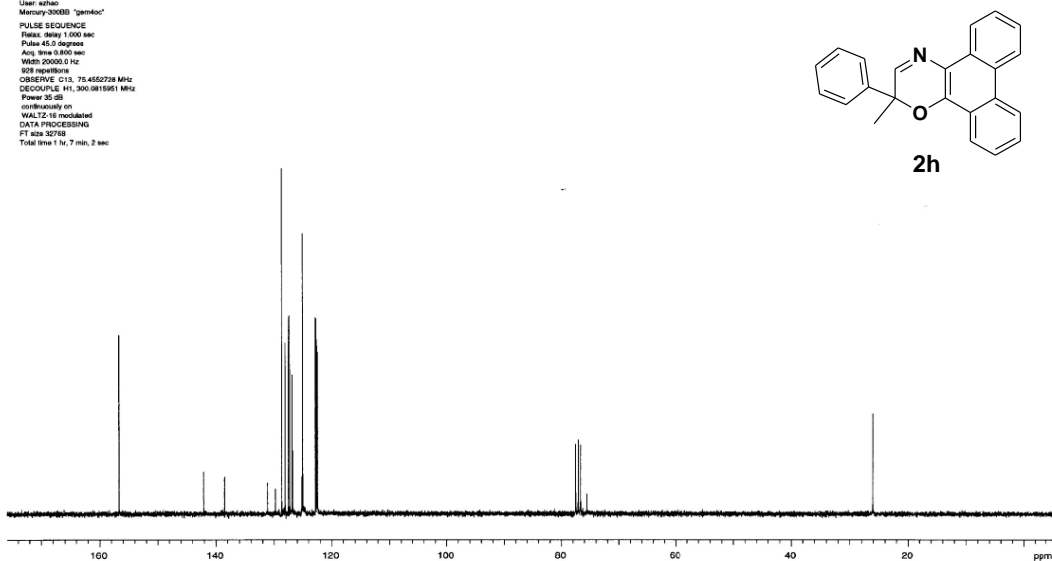

Supplement: Supplementary file 1 [file 4254952]
